# Supplementary material for: Converting real-world mixed waste plastics into porous carbon nanosheets with excellent performance in the adsorption of an organic dye from wastewater
Source: Royal Society of Chemistry journal article supplement (doi:10.1039/c4ta05118a), 2014-10-31
Supplement: c4ta05118a1.pdf [file c4ta05118a1.pdf]

## Electronic Supporting Information (ESI)

# Converting “real-world” mixed waste plastics into porous carbon nanosheet with excellent performance in adsorption of organic dye from wastewater

Jiang Gong, Jie Liu, Xuecheng Chen, Zhiwei Jiang, Xin Wen, Ewa Mijowska and Tao Tang\*

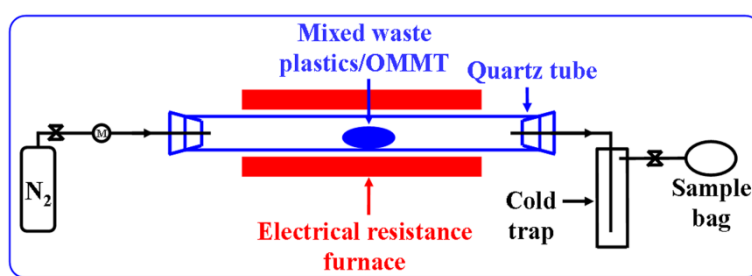

**Fig. S1** Schematic diagram of the carbonization of the “real-world” mixed waste plastics/OMMT at 700 °C to prepare CNS/MMT composite.

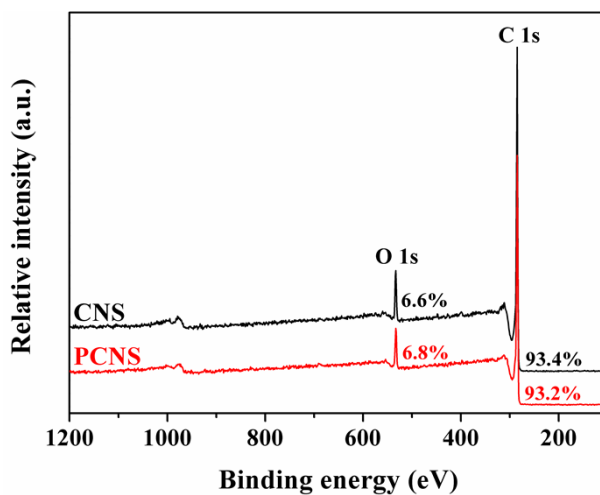

**Fig. S2** XPS spectra of CNS and PCNS.

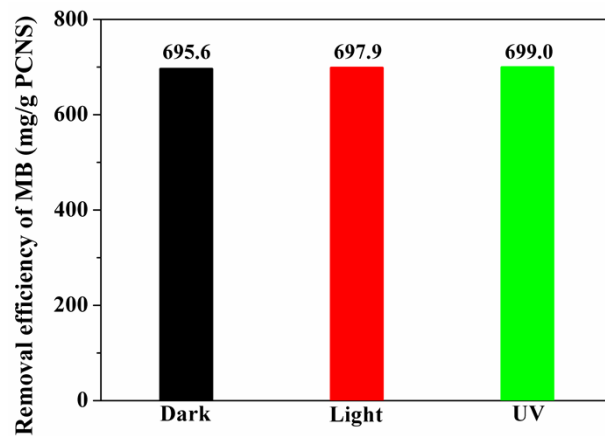

**Fig. S3** The removal efficiency of MB by PCNS in the different entrainment (Experimental conditions: MB concentration = 350 mg/L, PCNS concentration = 0.5 g/L, and adsorption time = 180 min in dark environment (Dark), normal slight white light source (Light), or UV light (UV) using an 8 W tubular UV lamp (from Spectronics Corporation, USA) basically emitting at 254 nm).
